# Supplementary material for: The Preferred Retinal Locus Used to Watch Videos
Source: PubMed Central journal article supplement — Invest Ophthalmol Vis Sci. 2017 Dec;58(14):6073–81. doi: 10.1167/iovs.17-21839 (PMC5714047; doi:10.1167/iovs.17-21839), 2017-12
Supplement: iovs-58-13-45_s01.pdf [file iovs-58-13-45_s01.pdf]

## Supplementary figures

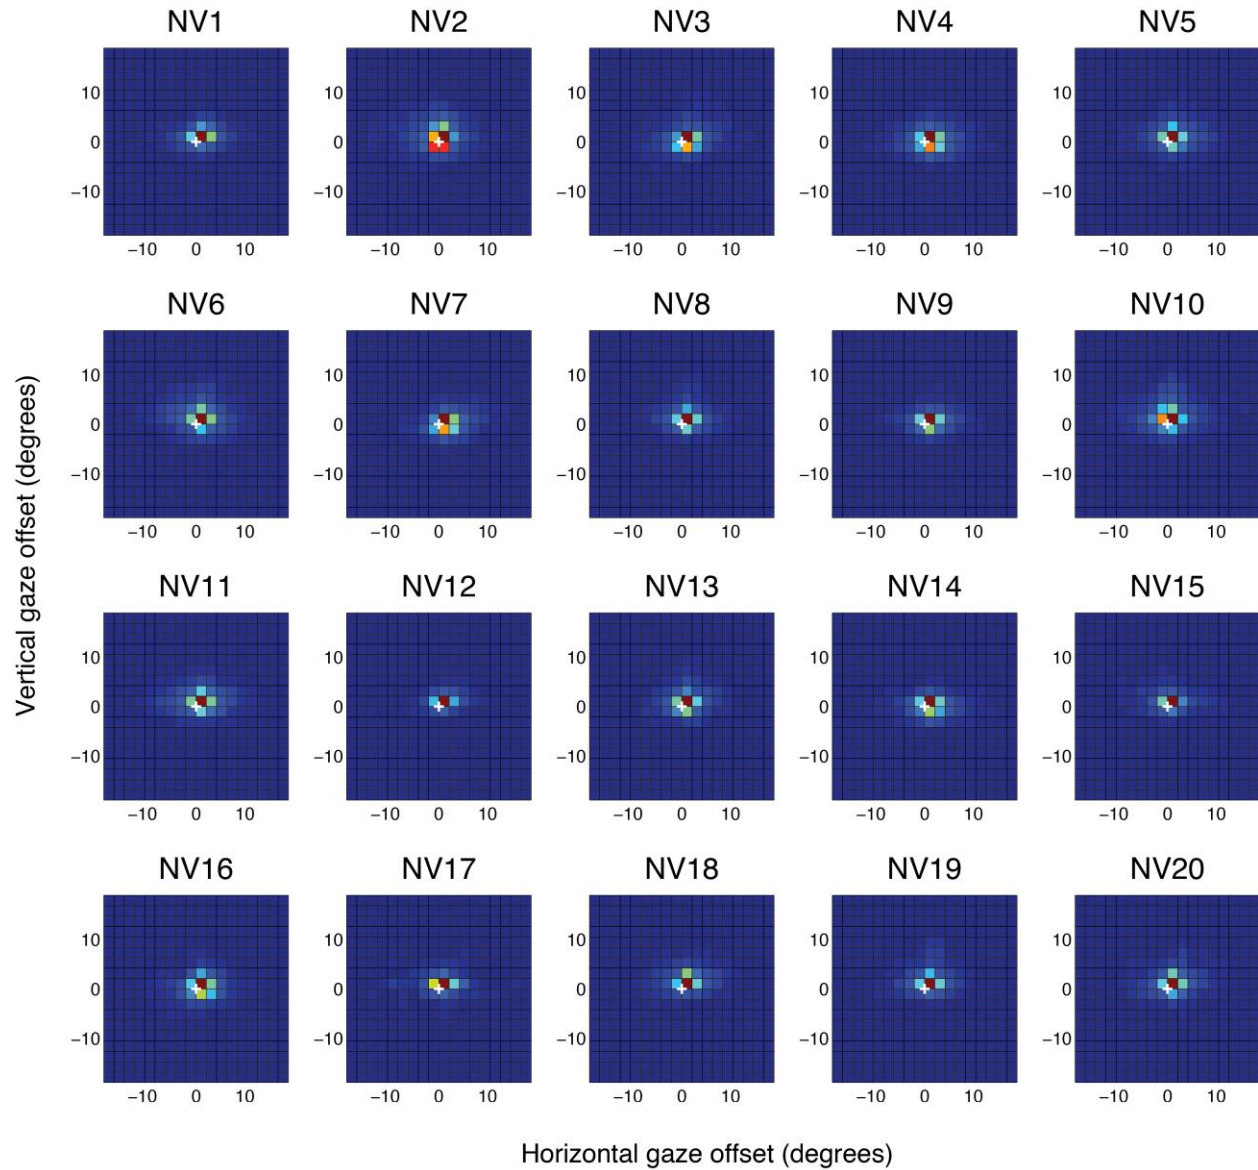

Supplementary Figure S1. Average 2D histogram of gaze-offset distances in the 20 NV-match participants. Each panel represents the distribution of gaze-offset distances for one participant with NV.

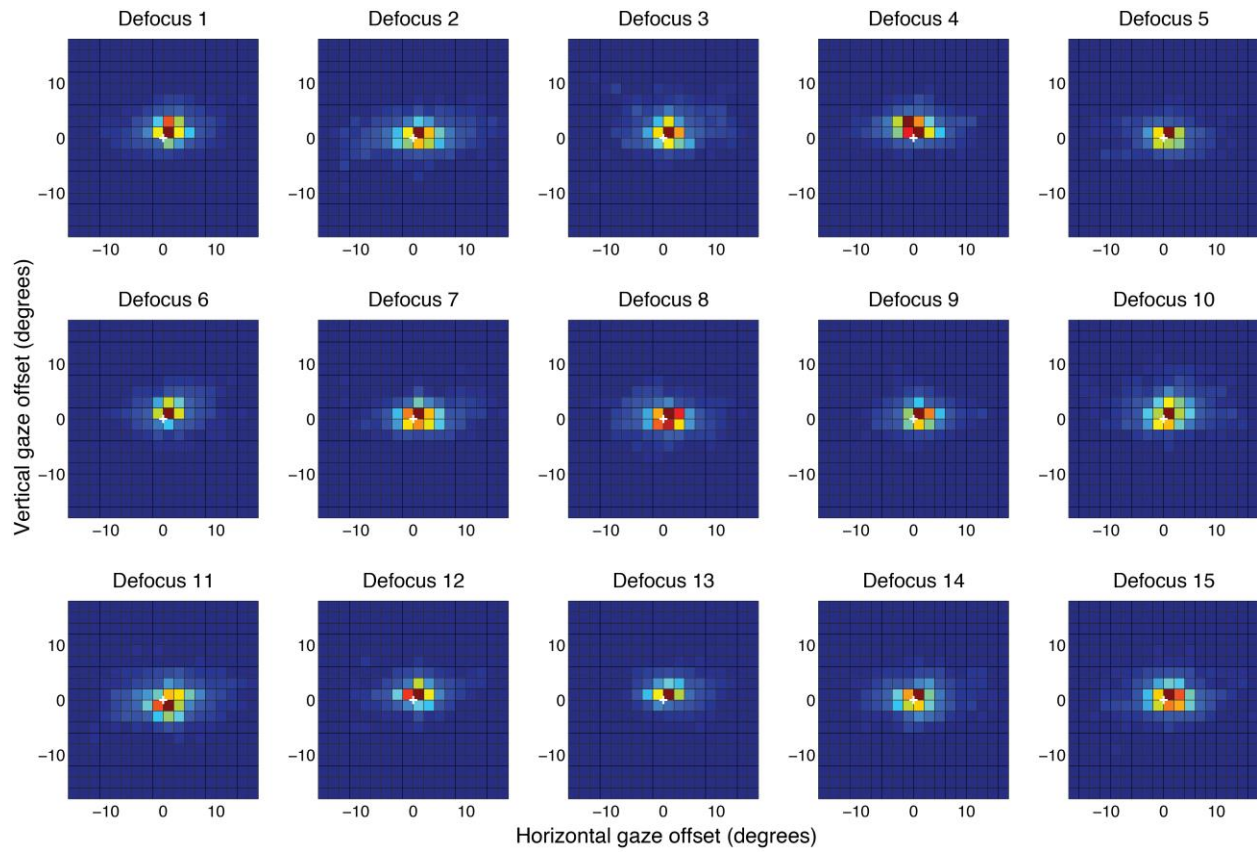

Supplementary Figure S2. Average 2D histogram of gaze-offset distances in the 15 NV-defocus participants. Each panel represents the distribution of gaze-offset distances for one participant with NV averaged across all five levels of blur (20/16 to 20/800).

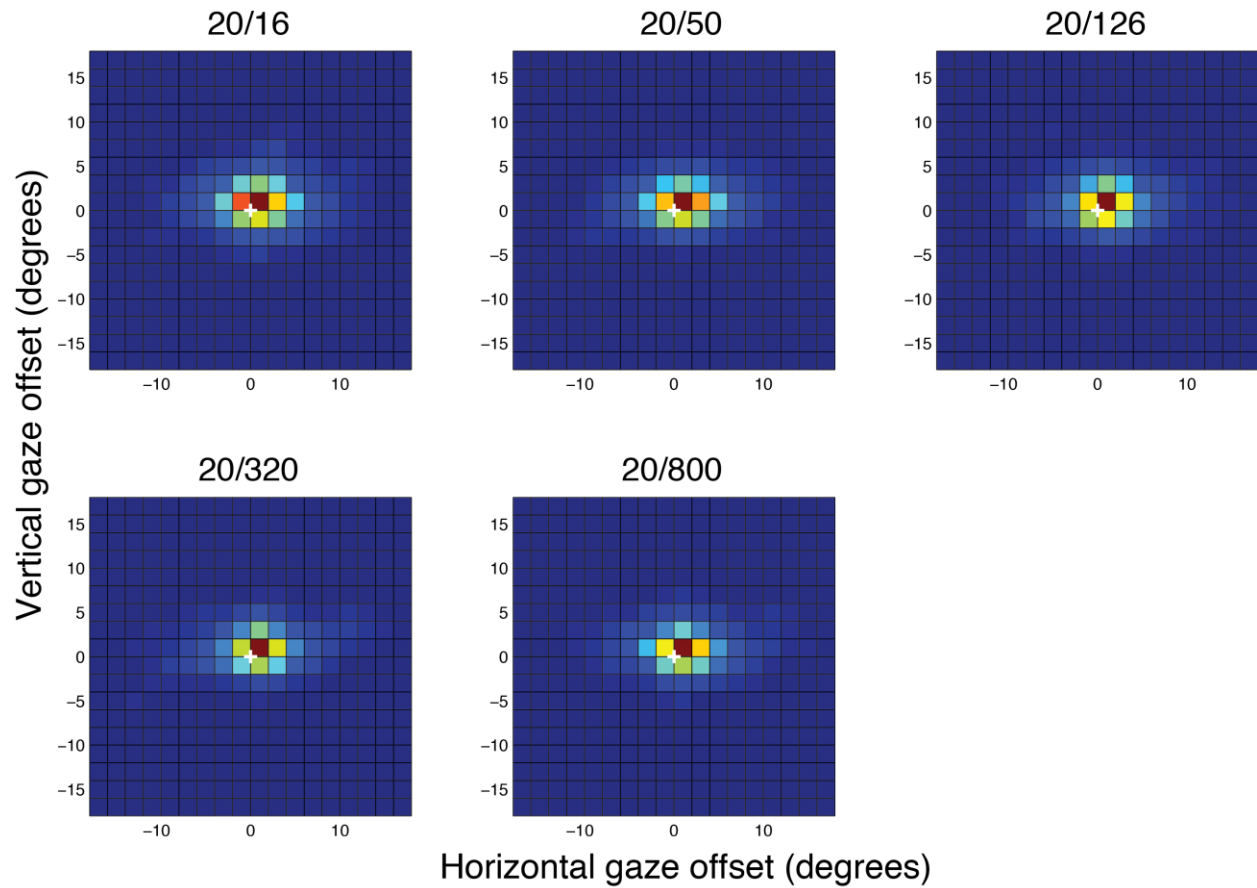

Supplementary Figure S3. Average 2D histogram of gaze-offset distances for all defocus participants grouped for the five different defocus levels (20/16 to 20/800).
